# Supplementary material for: High Molecular Weight Hyaluronan Suppresses Macrophage M1 Polarization and Enhances IL-10 Production in PM2.5-Induced Lung Inflammation
Source: PubMed Central journal article supplement (PMC6539614; doi:10.3390/molecules24091766), 2019-05-07
Supplement: molecules-24-01766-s001.pdf [file molecules-24-01766-s001.pdf]

Supplementary Materials:

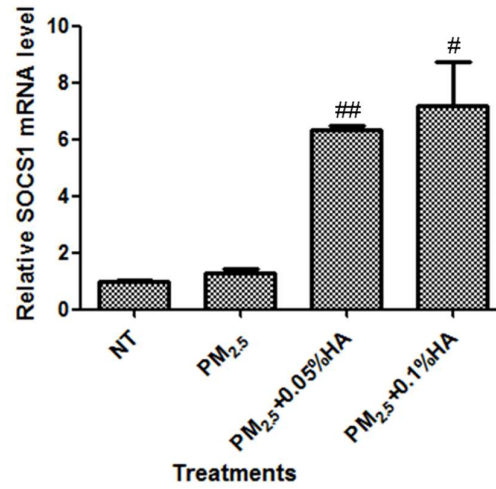

**Figure S1** HMW-HA up-regulates SOCS1 mRNA level in PM<sub>2.5</sub>-stimulated NR8383 cells. Cells were exposed to PBS, PM<sub>2.5</sub>, PM<sub>2.5</sub> and 0.05% HMW-HA, or PM<sub>2.5</sub> and 0.1% HMW-HA simultaneously for 6 h, and the mRNA expression of SOCS1 was determined by real-time RT-PCR. Data are presented as mean  $\pm$  SD, and represent three independent experiments. #  $p < 0.05$  and ##  $p < 0.01$ , compared with cells exposed to PM<sub>2.5</sub> alone.
